# Supplementary material
Source: PubMed Central journal article supplement (PMC7964662)
Supplement: 3324_materials.pdf [file 3324_materials.pdf]

## ON-LINE APPENDIX

### Search Strategies

#### PubMed

((“Brain Neoplasms”[MeSH Terms] OR “Glioma”[MeSH Terms] OR glioma\* OR (glioblastoma\* OR “glioblastoma multiforme”) OR (astrocytoma\* OR “anaplastic astrocytoma”) OR (oligodendrocytoma\* OR “anaplastic oligodendrocytoma”) OR (brain AND (tumor\* OR tumour\*)) OR (neuroectodermal AND (tumor\* OR tumour\*)) OR ependymoma\* OR oligodendroglioma\*) AND (“Tomography, Emission-Computed”[MeSH Terms] OR (positron AND emission AND tomograph\*) OR pet) AND “humans”[MeSH Terms])

#### Scopus

(TITLE-ABS-KEY (glioma\*) OR TITLE-ABS-KEY (glioblastoma\*) OR TITLE-ABS-KEY (glioblastoma PRE/0 multiforme) OR TITLE-ABS-KEY (astrocytoma\*) OR TITLE-ABS-KEY (anaplastic PRE/0 astrocytoma) OR TITLE-ABS-KEY (oligodendrocytoma\*) OR TITLE-ABS-KEY (anaplastic PRE/0 oligodendrocytoma) OR TITLE-ABS-KEY (brain tumo\*r\*) OR TITLE-ABS-KEY (neuroectodermal PRE/0 tumo\*r\*) OR TITLE-ABS-KEY (ependymoma\*) OR TITLE-ABS-KEY (oligodendroglioma\*) AND TITLE-ABS-KEY (positron PRE/0 emission PRE/0 tomograph\*) OR TITLE-ABS-KEY (pet).

## PUBLICATIONS EXCLUDED AFTER FULL-TEXT SCREENING

### Relevant but <10 Patients (n = 7)

1. Lichy MP, Bachert P, Henze M, et al. **Monitoring individual response to brain-tumor chemotherapy: proton MR spectroscopy in a patient with recurrent glioma after stereotactic radiation therapy.** *Neuroradiology* 2004;46:126–29
2. Pruijm J, Willemsen AT, Molenaar WM et al. **Brain tumors: L-[1-C-11]tyrosine PET for visualization and quantification of protein synthesis rate.** *Radiology* 1995;197:221–26
3. Kim EE, Chung SK, Haynie TP et al. **Differentiation of residual or recurrent tumors from posttreatment changes with F-18 FDG PET.** *Radiographics* 1992;12:269–79
4. Di Chiro G, Oldfield E, Wright DC, et al. **Cerebral necrosis after radiation therapy and/or intra-arterial chemotherapy for brain tumor: PET and neuropathologic studies.** *AJR Am J Roentgenol* 1988;150:189–97
5. Glantz MJ, Hoffman JM, Coleman RE et al. **Identification of early recurrence of primary central nervous system tumors by [18F]fluorodeoxyglucose positron emission tomography.** *Ann Neurol* 1991; 29:347–55
6. Ogawa T, Kanno I, Shishido F et al. **Clinical value of PET with 18F-fluorodeoxyglucose and L-methyl-11C-methionine for diagnosis of recurrent brain tumor and radiation injury.** *Acta Radiol* 1991;32: 197–202
7. Chao ST, Suh JH, Raja S, et al. **The sensitivity and specificity of FDG PET in distinguishing recurrent brain tumor from radionecrosis in patients treated with stereotactic radiosurgery.** *Int J Cancer* 2001;96: 191–97

### Partially Eligible but Pertinent Data Not Extractable (n = 6)

8. Yamane T, Sakamoto S, Senda M. **Clinical impact of (11)C-methionine PET on expected management of patients with brain neoplasm.** *Eur J Nucl Med Mol Imaging* 2010;37:685–90
9. Chen W, Silverman DH, Delaloye S, et al. **18F-FDOPA PET imaging of brain tumors: comparison study with 18F-FDG PET and evaluation of diagnostic accuracy.** *J Nucl Med* 2006;47:904–11
10. Henze M, Mohammed A, Schlemmer HP et al. **PET and SPECT for detection of tumor progression in irradiated low-grade astrocytoma: a receiver-operating-characteristic analysis.** *J Nucl Med* 2004;45:579–86
11. Wang SX, Boethius J, Ericson K. **FDG-PET on irradiated brain tumor: ten years' summary.** *Acta Radiol* 2006;47:85–90
12. Deshmukh A, Scott JA, Palmer EL, et al. **Impact of fluorodeoxyglucose positron emission tomography on the clinical management of patients with glioma.** *Clin Nucl Med* 1996;21:720–25
13. Maldonado A, Alfonso JM, Ossola G, et al. **The role of PET-FDG in resolving diagnostic doubt: recurrence versus radionecrosis in brain tumors: experience in 94 patients.** *Riv Neuroradiol* 2003;16:887–90

### All Recurrent Cases (n = 4)

14. Hübner KF, Thie JA, Smith GT, et al. **Positron emission tomography (PET) with 1-aminocyclobutane-1-[(11)C]carboxylic acid (1-[(11)C]-ACBC) for detecting recurrent brain tumors.** *Clin Positron Imaging* 1998;1:165–73
15. Ishikawa M, Kikuchi H, Miyatake S, et al. **Glucose consumption in recurrent gliomas.** *Neurosurgery* 1993;33:28–33
16. Yamamoto Y, Wong TZ, Turkington TG, et al. **3'-deoxy-3'-[F-18]fluorothymidine positron emission tomography in patients with recurrent glioblastoma multiforme: comparison with Gd-DTPA enhanced MR imaging.** *Mol Imaging Biol* 2006;8:340–47
17. Grosu AL, Astner ST, Riedel E, et al. **An interindividual comparison of O-(2- [(18)F]fluoroethyl)-L-tyrosine (FET)- and L-[methyl-(11)C]methionine (MET)-PET in patients with brain gliomas and metastases.** *Int J Radiat Oncol Biol Phys* 2011;81:1049–58

### Irrelevant (n = 5)

18. Weber WA, Wester HJ, Grosu AL et al. **O-(2-[18F]fluoroethyl)-L-tyrosine and L-[methyl-11C]methionine uptake in brain tumors: initial results of a comparative study.** *Eur J Nucl Med* 2000;27: 542–49
19. Blasberg RG, Roelcke U, Weinreich R et al. **Imaging brain tumor proliferative activity with [124I]iododeoxyuridine.** *Cancer Res* 2000;60:624–35
20. Willemsen AT, van WA, Paans AM et al. **In vivo protein synthesis rate determination in primary or recurrent brain tumors by using L-[1-11C]-tyrosine and PET.** *J Nucl Med* 1995;36:411–19
21. Pirotte B, Goldman S, David P et al. **Stereotactic brain biopsy guided by positron emission tomography (PET) with [F-18]fluorodeoxyglucose and [C-11]methionine.** *Acta Neurochir Suppl* 1997;68:133–38
22. Ledezma CJ, Chen W, Sai V, et al. **18F-FDOPA PET/MR imaging fusion in patients with primary/recurrent gliomas: initial experience.** *Eur J Radiol* 2009;71:242–48

### Not a Dedicated PET Scanner (n = 1)

23. Stokkel M, Stevens H, Taphoorn M, et al. **Differentiation between recurrent brain tumor and postradiation necrosis: the value of 201TI SPET versus 18F-FDG PET by using a dual-headed coincidence camera—a pilot study.** *Nucl Med Commun* 1999;20:411–17

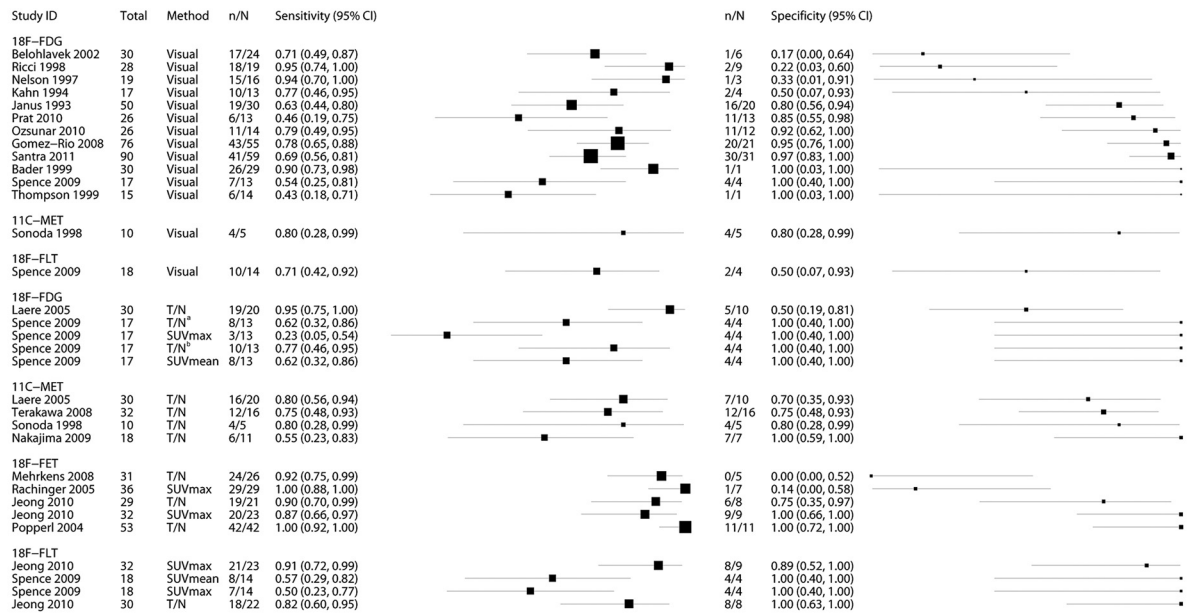

A

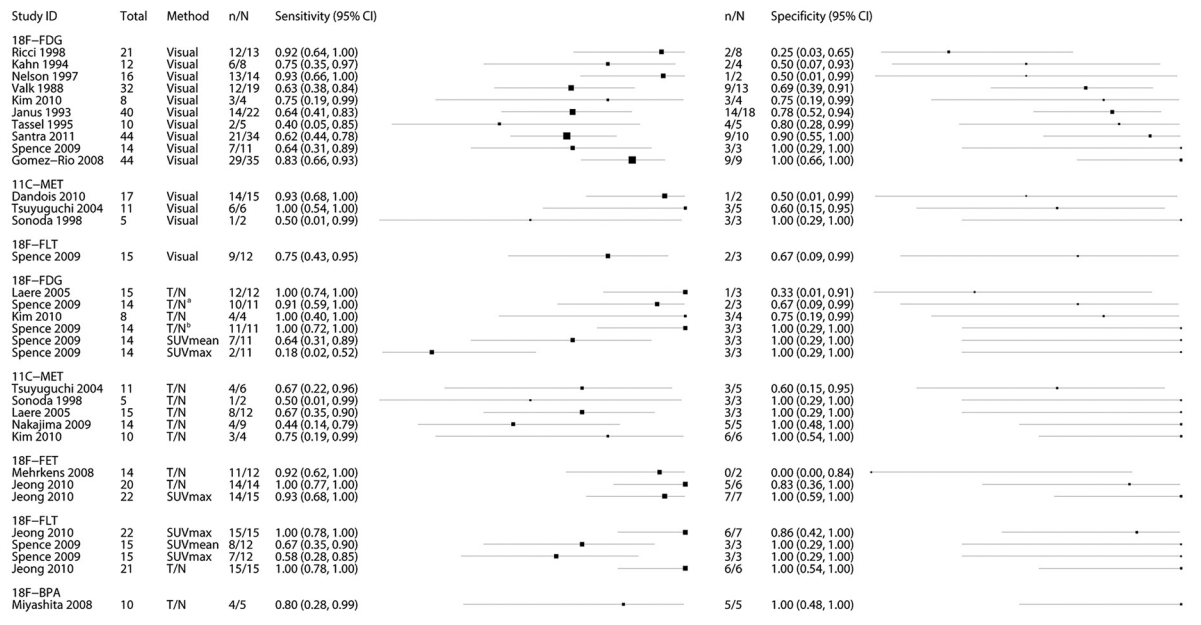

B

**ON-LINE FIG 1.** Sensitivity and specificity of PET for differentiating glioma recurrence from treatment-induced necrosis (for both low- and high-grade gliomas [A] and high-grade glioma only [B]). Squares (proportional to the number of patients) represent the point estimates of sensitivity and specificity; extending lines represent the 95% confidence interval (CI) of each estimate; and n/n denotes true-positive cases divided by recurrent cases for sensitivity, and true-negative cases divided by nonrecurrent cases for specificity. BPA indicates <sup>18</sup>F-boronophenylalanine; V, visual assessment.

<sup>a</sup> tumor-to-cortex ratio.

<sup>b</sup> tumor-to-white matter ratio.

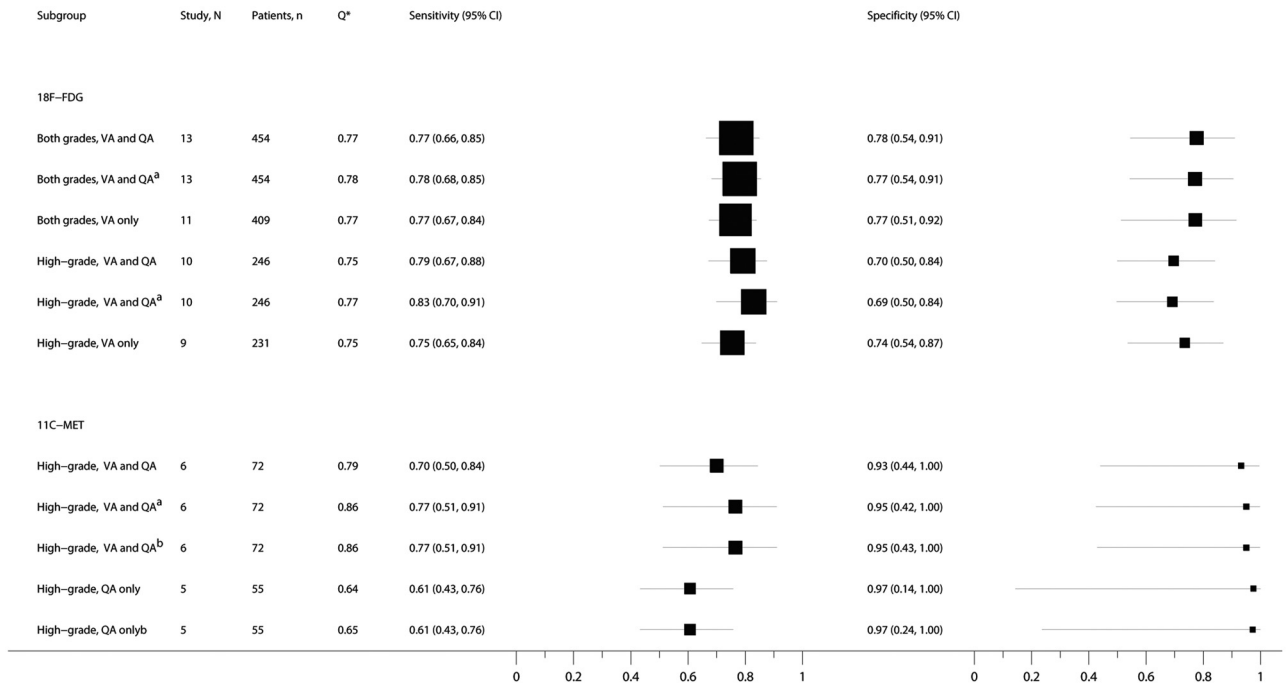

**ON-LINE FIG 2.** Subgroup and sensitivity analyses of sensitivity and specificity. Squares (proportional to the number of patients) represent point estimates of sensitivity and specificity; extending lines represent the 95% confidence interval of each estimate. QA indicates, quantitative assessment; VA, visual assessment; Q\*, “Q-star” statistic, a global summary of the ROC curve (see text for details).

<sup>a</sup> Sensitivity analyses preferring quantitative assessment for <sup>18</sup>F-FDG PET and visual assessment for <sup>11</sup>C-MET PET (see text for details).

<sup>b</sup> Sensitivity analyses preferring the optimal cutoff threshold for defining positive and negative scans by receiver operating characteristic analysis (see text for details).

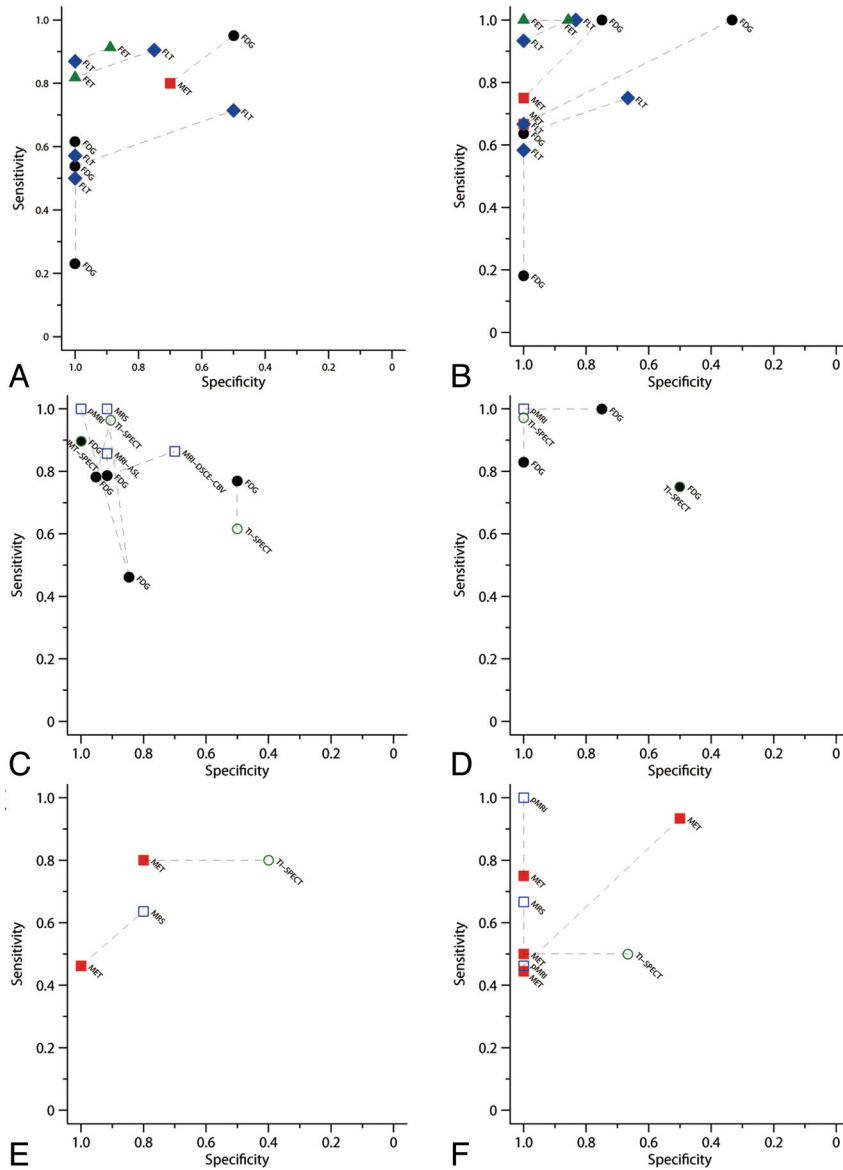

**ON-LINE FIG 3.** Comparative accuracy of PET for differentiating recurrent glioma from treatment-induced necrosis. Comparisons among different PET tracers for both high- and low-grade glioma histology (A) and high-grade glioma only (B), between  $^{18}\text{F}$ -FDG PET and other imaging modalities for any glioma histology (C) and high-grade glioma (D), and between  $^{11}\text{C}$ -MET PET and other imaging modalities for both high- and low-grade glioma histology (E) and high-grade glioma only (F). Closed and open symbols, respectively, indicate PET and comparator imaging modalities. Dashed lines connect estimates for pairs of different PET tracers in (eg,  $^{18}\text{F}$ -FDG-PET versus  $^{11}\text{C}$ -MET) or of PET and a comparator imaging test (eg,  $^{18}\text{F}$ -FDG-PET versus TI-SPECT) compared in a study. Closed circle (black), square (red), triangle (green), and diamond (blue), respectively, indicate PET with FDG, MET, FET, and FLT. Open circle (green) and square (blue), respectively, indicate SPECT and MR imaging-based novel imaging.

**ON-LINE TABLE 1: Study characteristics of positron-emission tomography to differentiate recurrence from treatment-related necrosis in treated glioma**

| Study                                        | Country     | Study Period (yr) | Patient (No.) | Institution (No.) | Design        | Clinical Context       | Indication                                                                   | Tracer   | Comparator Imaging Tests | Prior Imaging Tests | Median Time (from Dx/Tx) to Imaging (range) (mo) | Reference Standard                        | Median Follow-Up after PET (range) (mo)        |
|----------------------------------------------|-------------|-------------------|---------------|-------------------|---------------|------------------------|------------------------------------------------------------------------------|----------|--------------------------|---------------------|--------------------------------------------------|-------------------------------------------|------------------------------------------------|
| Any grades<br>Janus et al 1993 <sup>16</sup> | US          | ND                | 50            | 1                 | Retrospective | ND                     | Suspected recurrence, radiation necrosis, or others by MRI                   | FDG      | None                     | Enhanced MRI        | 11 (1–208)                                       | Bx or clinical follow-up                  | 12 (5–27) <sup>a</sup>                         |
| Kahn et al 1994 <sup>17</sup>                | US          | ND                | 17            | 1                 | Prospective   | ND                     | Suspected recurrence by deteriorating clinical course or change in MRI or CT | FDG      | TI-SPECT                 | Enhanced MRI or CT  | 33 (6–120) (Dx)                                  | Bx or clinical follow-up                  | 12 (1–32)                                      |
| Nelson et al 1997 <sup>18</sup>              | US          | 1994–1995         | 19            | 1                 | Retrospective | ND                     | Suspected recurrence by MRI                                                  | FDG      | None                     | Enhanced MRI        | ND                                               | Clinical follow-up only                   | 8 (2–22)                                       |
| Ricci et al 1998 <sup>19</sup>               | US          | 1993–1995         | 31            | 1                 | Retrospective | ND                     | Suspected recurrence or radiation necrosis by symptoms and MRI               | FDG      | None                     | Enhanced MRI        | ND                                               | Bx only                                   | NA                                             |
| Sonoda et al 1998 <sup>20</sup>              | Japan       | ND                | 10            | 1                 | Retrospective | ND                     | Highly suggestive of recurrence by MRI                                       | MET      | TI-SPECT                 | MRI                 | ND                                               | Bx/surgery or clinical follow-up for 3 mo | ND                                             |
| Bader et al 1999 <sup>21</sup>               | Germany     | ND                | 30            | 1                 | Prospective   | ND                     | Suspected recurrence                                                         | FDG      | IMT-SPECT                | ND                  | 24 (6–144) (Tx)                                  | Bx only                                   | NA                                             |
| Thompson et al 1992 <sup>2</sup>             | US          | ND                | 15            | 1                 | Retrospective | ND                     | Suspected progression or necrosis by CT or MRI                               | FDG      | None                     | MRI or CT           | 37 <sup>b</sup> (7–90) (Tx)                      | Bx only                                   | NA                                             |
| Belohávek et al 2002 <sup>23</sup>           | Czech       | ND                | 29            | 1                 | Retrospective | ND                     | Suspected recurrence                                                         | FDG      | None                     | Enhanced MRI        | ND (4–64) (Tx)                                   | Bx or clinical follow-up                  | ND (2–28)                                      |
| Pöpperl et al 2004 <sup>24</sup>             | Germany     | ND                | 53            | 1                 | Retrospective | Post 1st- and 2nd-line | Suspected recurrence                                                         | FET      | None                     | MRI or CT           | 36 (4–180) (Dx)                                  | Bx or clinical follow-up for 2 mo by MRI  | Mean 34 (16–69) <sup>c</sup>                   |
| Van Laere et al 2005 <sup>25</sup>           | Belgium     | 1997–2000         | 30            | 1                 | Retrospective | Post 1st-line          | To differentiate tumor recurrence from radiation necrosis                    | FDG, MET | None                     | MRI or CT           | 48 (1–216)                                       | Survival/death at last follow-up          | 15                                             |
| Rachinger et al 2005 <sup>26</sup>           | Germany     | 2001–2003         | 36            | 1                 | Retrospective | ND                     | Suspected recurrence or progression                                          | FET      | None <sup>d</sup>        | MRI                 | ND                                               | Bx or clinical follow-up                  | 9 (5–18) <sup>e</sup><br>8 (4–20) <sup>f</sup> |
| Gómez-Río et al 2008 <sup>27</sup>           | Spain       | 2002–2005         | 76            | 1                 | Prospective   | Post 1st-line          | Suspected recurrence by clinical symptoms and MRI <sup>g</sup>               | FDG      | TI-SPECT                 | MRI                 | ND                                               | Bx or clinical follow-up <sup>h</sup>     | 31 (9–48)                                      |
| Mehrkens et al 2008 <sup>28</sup>            | Germany     | 2003–2004         | 31            | 1                 | Prospective   | ND                     | Suspected recurrence or progression by MRI                                   | FET      | None                     | Enhanced MRI        | ND                                               | Bx and/or clinical follow-up              | 24 (10–32)                                     |
| Terakawa et al 2008 <sup>29</sup>            | Japan       | 1995–2006         | 26            | 1                 | Retrospective | ND                     | Suspected recurrence or radiation necrosis by clinical symptoms and MRI      | MET      | None                     | MRI or CT           | 36 (Tx)                                          | Bx or clinical follow-up >6 mo by MRI     | ND                                             |
| Nakajima et al 2009 <sup>30</sup>            | Japan       | 1995–2008         | 18            | 1                 | Retrospective | ND                     | Suspected recurrence or radiation necrosis                                   | MET      | MRS                      | MRI                 | 15 (4–80) (Tx)                                   | Bx or clinical follow-up >6 mo by MRI     | 67 <sup>b</sup>                                |
| Spence et al 2009 <sup>40</sup>              | US          | ND                | 19            | 1                 | Retrospective | ND                     | To differentiate tumor recurrence from radiation necrosis                    | FDG, FLT | None                     | Enhanced MRI        | 24 (2–120) (Tx)                                  | Bx or clinical follow-up by MRI           | 14 (3–56)                                      |
| Jeong et al 2010 <sup>31</sup>               | South Korea | 2003–2009         | 32            | 1                 | Retrospective | ND                     | Suspected recurrence by MRI                                                  | FLT, FET | None                     | Enhanced MRI        | 13 <sup>b</sup> (1–114) (Tx)                     | Bx or clinical follow-up by MRI           | ND                                             |
| Ozsunar et al 2010 <sup>32</sup>             | US          | ND                | 30            | 1                 | Retrospective | ND                     | Suspected recurrence or necrosis by MRI                                      | FDG      | MRI-DSCE-CBV, MRI-ASL    | MRI                 | >6 mo <sup>e</sup>                               | Bx or clinical follow-up >12 mo           | ND                                             |
| Prat et al 2010 <sup>33</sup>                | Spain       | ND                | 26            | 1                 | Retrospective | ND                     | Suspected recurrence, histologic upgrading, or radiation necrosis by MRI     | FDG      | MRS, pMRI                | Enhanced MRI        | ND                                               | Bx or clinical follow-up >5 mo by MRI     | 5.6 <sup>b,c</sup><br>14.7 <sup>b,c</sup>      |
| Santra et al 2012 <sup>41</sup>              | India       | 2006–2008         | 90            | 1                 | Prospective   | ND                     | Clinical suspicion of recurrence                                             | FDG      | None                     | None                | ND                                               | Bx or clinical follow-up ≥6 mo by imaging | ND                                             |

continued

ON-LINE TABLE 1, continued

| Study                                            | Country     | Study Period (yr) | Patient (No.) | Institution (No.) | Design        | Clinical Context       | Indication                                                             | Tracer   | Comparator Imaging Tests | Prior Imaging Tests           | Median Time (from Dx/Tx) to Imaging (range) (mo) | Reference Standard                           | Median Follow-Up after PET (range) (mo)            |
|--------------------------------------------------|-------------|-------------------|---------------|-------------------|---------------|------------------------|------------------------------------------------------------------------|----------|--------------------------|-------------------------------|--------------------------------------------------|----------------------------------------------|----------------------------------------------------|
| High-grade only<br>Valk et al 1988 <sup>34</sup> | US          | ND                | 32            | 1                 | Retrospective | ND                     | Worsening of symptoms or CT findings                                   | FDG      | None                     | CT                            | 11 (3–27) (Tx)                                   | Bx or clinical follow-up                     | 8 (2–37)                                           |
| Van Tassel et al 1995 <sup>35</sup>              | US          | 1988–1992         | 10            | 1                 | Retrospective | Post 1st-line          | New enhancing parenchymal lesions by MRI                               | FDG      | None                     | Enhanced MRI or CT            | ND                                               | Bx only                                      | NA                                                 |
| Tsuyuguchi et al 2004 <sup>36</sup>              | Japan       | ND                | 11            | 1                 | Retrospective | Post 1st-line          | Suspected recurrence or necrosis                                       | MET      | None                     | MRI                           | 7                                                | Bx or clinical follow-up >5 mo by MRI        | 7 (5–12)                                           |
| Miyashita et al 2008 <sup>37</sup>               | Japan       | 2002–2006         | 10            | 1                 | Retrospective | Post 1st- and 2nd-line | Suspected recurrence or progression by MRI                             | BPA      | None                     | Enhanced MRI <sup>l</sup>     | ND                                               | Bx or clinical follow-up by MRI <sup>l</sup> | ND                                                 |
| Dandois et al 2010 <sup>38</sup>                 | Belgium     | ND                | 28            | 1                 | Retrospective | ND                     | Suspected recurrence or necrosis                                       | MET      | pMRI                     | Enhanced MRI, FLAIR, MRI, DWI | ND                                               | Bx or clinical follow-up including PET       | 13 <sup>b</sup> (3–40)                             |
| Kim et al 2010 <sup>39</sup>                     | South Korea | 2001–2007         | 10            | 1                 | Retrospective | Post 1st-line          | Newly enhanced lesions by MRI, without clinical evidence of recurrence | FDG, MET | pMRI                     | MRI                           | ND                                               | Bx or clinical follow-up >12 mo              | 6.5 (6–10) <sup>c</sup><br>28 (18–50) <sup>c</sup> |

**Note.**—ASL indicates arterial spin-labeling; DSCE, dynamic susceptibility contrast-enhanced; BPA, 18F-boronophenylalanine; pMRI = perfusion MR imaging; Bx, biopsy; Dx, diagnosis; IMT, 123I-alpha-methyl-tyrosine; NA, not applicable; ND, no data; Tx, therapy.

<sup>a</sup> Only living patients.

<sup>b</sup> Mean.

<sup>c</sup> Nonrecurrent patients.

<sup>d</sup> Conventional MRI was compared.

<sup>e</sup> Patients followed up without biopsy.

<sup>f</sup> Biopsied patients.

<sup>g</sup> The Macdonald Criteria (Macdonald D, Cascino TJ, Schold SJ, et al: Response criteria for phase II studies of supratentorial malignant glioma. *J Clin Oncol* 1990;8:1277–80) were used.

<sup>h</sup> Stable disease required no changes by MRI >3 months for high-grade glioma and >6 months for low-grade glioma.

<sup>i</sup> After completion of proton beam therapy.

<sup>j</sup> Recurrent patients.

<sup>k</sup> Previously performed BPA-PET was also used.

<sup>l</sup> Stable disease required no changes by MRI for >4 months.

**ON-LINE TABLE 2: Patient and therapy characteristics of studies of positron-emission tomography to differentiate recurrence from treatment-related necrosis in treated glioma**

| Study                               | Patient (No.) | Median Age (yr)                      | Male (%)        | Histology (%)               | Tumor Location (%)                     | Treatment (%)                                                                                                                                               | Use of TMZ (%) |
|-------------------------------------|---------------|--------------------------------------|-----------------|-----------------------------|----------------------------------------|-------------------------------------------------------------------------------------------------------------------------------------------------------------|----------------|
| Any grades                          |               |                                      |                 |                             |                                        |                                                                                                                                                             |                |
| Janus et al 1993 <sup>16</sup>      | 50            | 39 (15–66)                           | 64              | LG: 20; HG: 80              | ND                                     | LG: Surg + RTx + Cx (40), Surg + RTx (40), RTx + Cx (10), Surg alone (10); HG: Surg + RTx + Cx (73), Surg + RTx (15), RTx + Cx (8), RTx alone (3), none (3) | 0              |
| Kahn et al 1994 <sup>17</sup>       | 17            | 38 (26–57)                           | 52 <sup>a</sup> | LG: 29; HG: 71              | ND                                     | ND                                                                                                                                                          | 0              |
| Nelson et al 1997 <sup>18</sup>     | 19            | 47 (26–70)                           | 68              | LG: 16; HG: 84              | ND                                     | LG: RTx (34) HG: RTx (88)                                                                                                                                   | 0              |
| Ricci et al 1998 <sup>19</sup>      | 28            | 46 <sup>b</sup> (27–70) <sup>a</sup> | 55 <sup>a</sup> | LG: 25; HG: 75              | ND                                     | HG/LG: Surg + RTx ± Cx                                                                                                                                      | 0              |
| Sonoda et al 1998 <sup>20</sup>     | 10            | 36 (21–68)                           | 60              | LG: 50; HG: 50              | ND                                     | HG/LG: Surg + RTx + Cx (90), RTx + Cx (10)                                                                                                                  | 0              |
| Bader et al 1999 <sup>21</sup>      | 30            | 50 (32–70)                           | 73              | LG: 40; HG: 60              | ND                                     | HG/LG: Surg, RTx, or Surg + RTx                                                                                                                             | 0              |
| Thompson et al 1992 <sup>2</sup>    | 15            | 52 <sup>b</sup> (25–72)              | ND              | ND                          | ND                                     | HG/LG: RTx + Cx (93), RTx alone (7)                                                                                                                         | 0              |
| Belohlávek et al 2002 <sup>23</sup> | 29            | ND (17–65)                           | 72              | LG: 10; HG: 90              | ND                                     | ND                                                                                                                                                          | 0              |
| Popperl et al 2004 <sup>24</sup>    | 53            | ND                                   | 53              | LG: 19; HG: 81              | ND                                     | HG/LG: Surg + RTx                                                                                                                                           | 0              |
| Van Laere et al 2005 <sup>25</sup>  | 30            | 40 (11–69)                           | 70              | LG: 50; HG: 50              | Supratentorium: 93; infratentorium: 7  | LG: Surg + RTx (47), RTx (20), Cx (20), Surg + RTx + Cx (7), RTx + Cx (7); HG: Surg + RTx (73), RTx (20), RTx + Cx (7)                                      | ND             |
| Rachinger et al 2005 <sup>26</sup>  | 36            | 45 <sup>b</sup> (26–75) <sup>a</sup> | 51 <sup>a</sup> | LG: 24; HG: 76 <sup>c</sup> | ND                                     | HG/LG: “conventional” + RIT or paclitaxel                                                                                                                   | 0              |
| Gómez-Río et al 2008 <sup>27</sup>  | 76            | 48 <sup>b</sup> ± 16 <sup>d</sup>    | 57              | LG: 42; HG: 58              | ND                                     | HG/LG: Surg + RTx                                                                                                                                           | 0              |
| Mehrkens et al 2008 <sup>28</sup>   | 31            | 46 <sup>b</sup> (29–65)              | 55              | LG: 55; HG: 45              | Supratentorium: 100                    | LG: IRS (69), Surg (50), RTx (50), Cx (31); HG: Surg + RTx (100), Cx (43), IRS (14), RIT (7), IPDT (7)                                                      | ND             |
| Terakawa et al 2008 <sup>29</sup>   | 26            | 54 (14–83) <sup>a</sup>              | 60 <sup>a</sup> | LG: 23; HG: 77              | ND                                     | HG/LG: RTx ± SRS                                                                                                                                            | 0              |
| Nakajima et al 2009 <sup>30</sup>   | 18            | 45 <sup>b</sup> (14–67)              | 67              | LG: 22; HG: 78              | ND                                     | HG/LG: RTx + Cx (100)                                                                                                                                       | ND             |
| Spence et al 2009 <sup>40</sup>     | 19            | 46 (19–67)                           | 68              | LG: 16; HG: 84              | Supratentorium: 100                    | LG: RT (33), I RT + Cx (67); HG: RT (13), RTx + Cx including TMZ (87)                                                                                       | 74             |
| Jeong et al 2010 <sup>31</sup>      | 26            | ND                                   | 58              | LG: 15; HG: 85              | Lobar: 69; deep: 19; multicentric: 4   | GBM: Surg + RTx + TMZ (100); anaplastic tumors: Surg + RTx + BCNU (100); LG: Surg alone (100)                                                               | 42             |
| Ozsunar et al 2010 <sup>32</sup>    | 32            | 47 <sup>b</sup> (32–68)              | 38              | LG: 31; HG: 69              | ND                                     | LG: Surg (10), Surg + Cx (30), Surg + Cx + RTx (60); HG: Surg (4), Surg + Cx (23), Surg + Cx + RTx (50), Surg + RTx (14)                                    | ND             |
| Prat et al 2010 <sup>33</sup>       | 30            | 42 <sup>b</sup> (20–69)              | 73              | LG: 23; HG: 77              | ND                                     | LG/HG: Surg + RTx + PBRT ± Cx (100)                                                                                                                         | ND             |
| Santra et al 2012 <sup>41</sup>     | 90            | 37 <sup>b</sup> (12–68)              | 73              | LG: 40; HG: 60              | Supratentorium: 94; infratentorium: 6  | LG/HG: Surg + RTx (53), Surg + RTx + Cx (38), Surg or RTx (9)                                                                                               | ND             |
| High-grade only                     |               |                                      |                 |                             |                                        |                                                                                                                                                             |                |
| Valk et al 1988 <sup>34</sup>       | 32            | ND                                   | ND              | HG: 100                     | ND                                     | HG: Surg/Bx + RTx + Cx (75), Surg/Bx + RTx (25)                                                                                                             | 0              |
| Van Tassel et al 1995 <sup>35</sup> | 10            | ND                                   | ND              | HG: 100                     | ND                                     | HG: RTx + Cx (100)                                                                                                                                          | 0              |
| Tsuyuguchi et al 2004 <sup>36</sup> | 11            | 35 (23–62)                           | 72              | HG: 100                     | Supratentorium: 91; infratentorium: 9  | HG: Surg + RTx + SRS + Cx (100)                                                                                                                             | 0              |
| Miyashita et al 2008 <sup>37</sup>  | 10            | ND                                   | ND              | HG: 100                     | ND                                     | HG: Surg + RTx + BNCT (100)                                                                                                                                 | 0              |
| Dandois et al 2010 <sup>38</sup>    | 28            | 51 <sup>b</sup> (25–74)              | 57              | HG: 100                     | ND                                     | HG: RTx + TMZ (18), Surg + RTx + TMZ (82)                                                                                                                   | 100            |
| Kim et al 2010 <sup>39</sup>        | 10            | 46 <sup>b</sup> (31–66)              | 80              | HG: 100                     | Supratentorium: 90; infratentorium: 10 | HG: Surg + RTx (100), PCV (20), ACNU + CDDP (20), TMZ (50)                                                                                                  | 50             |

**Note:**—ACNU indicates nimustine; BCNU, carmustine; BNCT, boron neutron capture therapy; CDDP, cisplatin; Cx, chemotherapy; GBM, glioblastoma multiforme; HG, high-grade; IPDT, interstitial photodynamic therapy; IRS, interstitial radiosurgery; LG, low-grade; ND, no data; PBRT, proton beam radiation therapy; PCV, procarbazine, lomustine, vincristine; RIT, radioimmunotherapy; RTx, radiation therapy; Surg, surgery; TMZ, temozolomide; Bx, biopsy; SRS, stereotactic radiosurgery.

<sup>a</sup> Whole included patients, some of whom had irrelevant histologies.

<sup>b</sup> Mean.

<sup>c</sup> Whole included patients, some of whom were evaluated with PET for an irrelevant purpose.

<sup>d</sup> SD.

**ON-LINE TABLE 3: PET characteristics of studies of positron-emission tomography to differentiate recurrence from treatment-related necrosis in treated glioma**

| Study                               | PET Tracer            | Type of PET Scanner             | Model (Maker)                                                                         | Preparation (Time, hr)   | Administered PET Tracer Activity (MBq)         | Time of Scanning after Injection (min) | Scan Time (min)                 | Attenuation Correction | Image Reconstruction Method |
|-------------------------------------|-----------------------|---------------------------------|---------------------------------------------------------------------------------------|--------------------------|------------------------------------------------|----------------------------------------|---------------------------------|------------------------|-----------------------------|
| Any grades                          |                       |                                 |                                                                                       |                          |                                                |                                        |                                 |                        |                             |
| Janus et al 1993 <sup>16</sup>      | FDG                   | PET camera                      | Posicam 6.5 (Positron, Westmont, Illinois)                                            | ND                       | 185–370                                        | ND                                     | ~20                             | Performed              | ND                          |
| Kahn et al 1994 <sup>17</sup>       | FDG                   | PET camera                      | GE-4096 plus PET system (GEMS, Milwaukee, Wisconsin)                                  | Fasting (4)              | 370                                            | 0                                      | 45                              | Performed              | ND                          |
| Nelson et al 1997 <sup>18</sup>     | FDG                   | PET camera                      | ECAT Exact HR (Siemens, Erlangen, Germany)                                            | ND                       | 370                                            | 40                                     | 30                              | Performed              | ND                          |
| Ricci et al 1998 <sup>19</sup>      | FDG                   | PET camera                      | GE-4096 (GEMS)                                                                        | ND                       | 370                                            | 30                                     | 25                              | Performed              | FBP                         |
| Sonoda et al 1998 <sup>20</sup>     | MET                   | PET camera                      | PT931 (CTI, Largo, Maryland)                                                          | ND                       | 111–555                                        | 30                                     | 10                              | Performed              | ND                          |
| Bader et al 1999 <sup>21</sup>      | FDG                   | PET camera                      | ECAT Part1 (CTI/Siemens)                                                              | Fasting (≥12)            | 200                                            | ND                                     | ND                              | Performed              | FBP                         |
| Thompson et al 1992 <sup>22</sup>   | FDG                   | ND                              | ND                                                                                    | ND                       | ND                                             | ND                                     | ND                              | ND                     | ND                          |
| Belohlávek et al 2002 <sup>23</sup> | FDG                   | PET camera                      | ECAT Exact HR (Siemens)                                                               | Fasting (6)              | 3 <sup>a</sup>                                 | 35–40                                  | 15                              | Performed              | OSEM                        |
| Pöpperl et al 2004 <sup>24</sup>    | FET                   | PET camera                      | ECAT Exact HR+ (Siemens)                                                              | Fasting (≥6)             | 180                                            | 30                                     | 30                              | Performed              | FBP                         |
| Van Laere et al 2005 <sup>25</sup>  | FDG, MET              | PET camera                      | ECAT Exact HR (Siemens)                                                               | Fasting (≥12)            | 150 (FDG), 220 (MET)                           | 30 (FDG), 20–40 (MET)                  | 20 (FDG), 20 (MET)              | Performed              | FBP                         |
| Rachinger et al 2005 <sup>26</sup>  | FET                   | PET camera                      | ECAT Exact HR+ (Siemens)                                                              | Fasting (≥6)             | 180                                            | 0                                      | 60                              | Performed              | FBP                         |
| Gómez-Río et al 2008 <sup>27</sup>  | FDG                   | PET camera                      | ECAT Exact47 (Siemens)                                                                | Fasting (6) <sup>b</sup> | 185                                            | 45                                     | ND                              | ND                     | OSEM                        |
| Mehrkens et al 2008 <sup>28</sup>   | FET                   | PET camera                      | ECAT Exact HR+ (Siemens)                                                              | Fasting (≥6)             | 180                                            | 0                                      | 60                              | Performed              | FBP                         |
| Terakawa et al 2008 <sup>29</sup>   | MET                   | PET camera                      | Headtome IV (Shimadzu)                                                                | Fasting (ND)             | 6 <sup>a</sup>                                 | 20                                     | 10                              | Performed              | ND                          |
| Nakajima et al 2009 <sup>30</sup>   | MET                   | PET camera                      | Headtome V (Shimadzu)                                                                 | ND                       | 200–550                                        | 20                                     | 10                              | Performed              | FBP                         |
| Spence et al 2009 <sup>30</sup>     | FDG, FLT              | PET camera                      | GE Advanced PET tomography (GEMS)                                                     | Fasting (FDG)            | 3.7 <sup>a</sup> (FDG), 2.7 <sup>a</sup> (FLT) | 75 (FDG), 0 (FLT)                      | 15 (FDG), 90–120 (FLT)          | Performed              | ND                          |
| Jeong et al 2010 <sup>31</sup>      | FLT, FET              | PET camera, PET/CT <sup>c</sup> | ECAT Exact HR+ (Siemens), Biograph 6 PET/CT scanner (Siemens)                         | ND                       | 370                                            | 30                                     | 20 (PET), 10 (PET/CT)           | Performed              | OSEM                        |
| Ozsunar et al 2010 <sup>32</sup>    | FDG                   | PET camera                      | PC-384 or PC-4096 (Scanditronix, Uppsala, Sweden)                                     | ND                       | 185–370                                        | 0                                      | 45 minutes                      | Performed              | FBP                         |
| Prat et al 2010 <sup>33</sup>       | FDG                   | ND                              | ND                                                                                    | ND                       | ND                                             | ND                                     | ND                              | ND                     | ND                          |
| Santra et al 2012 <sup>41</sup>     | FDG                   | PET/CT                          | Biograph 2 PET/CT scanner (Siemens)                                                   | Fasting (4)              | 370                                            | 45–60                                  | 6–10                            | Performed              | OSEM                        |
| High-grade only                     |                       |                                 |                                                                                       |                          |                                                |                                        |                                 |                        |                             |
| Valk et al 1988 <sup>34</sup>       | FDG, <sup>82</sup> Rb | PET camera                      | Donner 280-Crystal Positron Ring (Lawrence Berkeley Laboratory, Berkeley, California) | ND                       | 370 (FDG), 555 ( <sup>82</sup> Rb)             | 0 (FDG), 0 ( <sup>82</sup> Rb)         | 45 (FDG), 5 ( <sup>82</sup> Rb) | Performed              | ND                          |
| Van Tassel et al 1995 <sup>35</sup> | FDG                   | ND                              | ND                                                                                    | ND                       | 185–370                                        | ND                                     | ND                              | ND                     | ND                          |
| Tsuyuguchi et al 2004 <sup>36</sup> | MET                   | PET camera                      | Headtome IV (Shimadzu)                                                                | Fasting (4)              | 370                                            | 20                                     | 10                              | Performed              | ND                          |
| Miyashita et al 2008 <sup>37</sup>  | BPA                   | PET camera                      | Headtome III (Shimadzu)                                                               | Fasting (4)              | 3.7–5.55 <sup>a</sup>                          | 0                                      | 60                              | ND                     | ND                          |
| Dandois et al 2010 <sup>38</sup>    | MET                   | PET camera                      | HR961 (CTI/Siemens)                                                                   | ND                       | 740                                            | 15                                     | 20                              | Performed              | FBP                         |
| Kim et al 2010 <sup>39</sup>        | FDG, MET              | PET camera                      | ECAT Exact 47 (Siemens)                                                               | Fasting (6)              | 370–555 (FDG), 550–740 (MET)                   | 40 (FDG), 10 (MET)                     | 20 (FDG), 20 (MET)              | Performed              | ND                          |

**Note:**—BPA indicates 18F-boronophenylalanine; FBP, filtered back-projection; ND, no data; OSEM, ordered subset expectation maximization; GEMS, GE Healthcare; <sup>82</sup>Rb, rubidium-82.

<sup>a</sup> Administered activity per kilogram of body weight.

<sup>b</sup> Fasting blood glucose <120 mg/dL was required for inclusion.

<sup>c</sup> Five of 32 patients were evaluated with PET/CT.



**ON-LINE TABLE 4: Diagnostic criteria of positron-emission tomography to differentiate recurrence from treatment-related necrosis in treated glioma**

| Study                                        | PET Drug | Method                                                                                                                                                                                                               | Visual Assessment                                                                                                                                                         |                                                                       | Quantitative Assessment, Cutoff Value                                                                                                                            | Referent Baseline Scan | No. of Interpreters | Experience of Interpreters                |
|----------------------------------------------|----------|----------------------------------------------------------------------------------------------------------------------------------------------------------------------------------------------------------------------|---------------------------------------------------------------------------------------------------------------------------------------------------------------------------|-----------------------------------------------------------------------|------------------------------------------------------------------------------------------------------------------------------------------------------------------|------------------------|---------------------|-------------------------------------------|
|                                              |          |                                                                                                                                                                                                                      | Positive Criteria                                                                                                                                                         | Negative Criteria                                                     |                                                                                                                                                                  |                        |                     |                                           |
| Any grades<br>Janus et al 1993 <sup>16</sup> | FDG      | Visual assessment                                                                                                                                                                                                    | Increase in activity relative to the contralateral hemisphere or adjacent area suggestive of tumor progression                                                            | Decreased activity                                                    | -                                                                                                                                                                | ND                     | 2                   | ND                                        |
| Kahn et al 1994 <sup>17</sup>                | FDG      | Visual assessment using a grading scale <sup>a</sup>                                                                                                                                                                 | Increased FDG uptake relative to the immediately adjacent tissue                                                                                                          | Markedly reduced or absent FDG uptake                                 | -                                                                                                                                                                | ND                     | 3                   | Experienced nuclear medicine specialists  |
| Nelson et al 1997 <sup>18</sup>              | FDG      | Visual assessment using a grading scale <sup>b</sup>                                                                                                                                                                 | ND                                                                                                                                                                        | ND                                                                    | -                                                                                                                                                                | ND                     | ND                  | Experienced (>15 year) interpreters       |
| Ricci et al 1998 <sup>19</sup>               | FDG      | Visual assessment using a grading scale <sup>c</sup>                                                                                                                                                                 | Hypermetabolic relative to contralateral white matter grade 2, or 3 <sup>c</sup>                                                                                          | Activity less than or equal to white matter grade 0 or 1 <sup>c</sup> | -                                                                                                                                                                | ND                     | ND                  | CAQ certified neuroradiologist            |
| Sonoda et al 1998 <sup>20</sup>              | MET      | Visual assessment, quantitative assessment using tumor-to-normal gray matter ratio (T/N) <sup>d</sup>                                                                                                                | Increased uptake                                                                                                                                                          | Normal or decreased uptake                                            | ND                                                                                                                                                               | ND                     | ND                  | ND                                        |
| Bader et al 1999 <sup>21</sup>               | FDG      | Visual assessment                                                                                                                                                                                                    | ND                                                                                                                                                                        | ND                                                                    | -                                                                                                                                                                | ND                     | ≥2                  | ND                                        |
| Thompson et al 1992 <sup>22</sup>            | FDG      | Visual assessment                                                                                                                                                                                                    | ND                                                                                                                                                                        | ND                                                                    | -                                                                                                                                                                | ND                     | ND                  | ND                                        |
| Belohlávek et al 2002 <sup>23</sup>          | FDG      | Visual assessment                                                                                                                                                                                                    | Clearly apparent focal accumulation of FDG                                                                                                                                | No focally enhanced activity                                          | -                                                                                                                                                                | ND                     | ND                  | ND                                        |
| Popperl et al 2004 <sup>24</sup>             | FET      | Quantitative assessment using SUVmax, quantitative assessment using SUVmax/background ratio <sup>e</sup>                                                                                                             | -                                                                                                                                                                         | -                                                                     | 2.2 (SUVmax), 2.0 (SUVmax/BG)                                                                                                                                    | ND                     | ND                  | ND                                        |
| Van Laere et al 2005 <sup>25</sup>           | FDG, MET | Quantitative assessment using tumor to contralateral cortical background uptake ratio                                                                                                                                | -                                                                                                                                                                         | -                                                                     | 0.8 (FDG), 2.2 (MET)                                                                                                                                             | ND                     | 2                   | ND                                        |
| Rachinger et al 2005 <sup>26</sup>           | FET      | Quantitative assessment using SUVmax                                                                                                                                                                                 | -                                                                                                                                                                         | -                                                                     | 2.2                                                                                                                                                              | ND                     | ND                  | ND                                        |
| Gómez-Río et al 2008 <sup>27</sup>           | FDG      | Visual assessment                                                                                                                                                                                                    | Unexplainable metabolic activity, increased FDG uptake lesion relative to immediately adjacent tissue or closest adjacent white matter in one or more transaxial sections | ND                                                                    | -                                                                                                                                                                | ND                     | ND                  | ND                                        |
| Mehrikens et al 2008 <sup>28</sup>           | FET      | Quantitative assessment using SUVmax/background ratio <sup>e</sup>                                                                                                                                                   | -                                                                                                                                                                         | -                                                                     | 2.0                                                                                                                                                              | ND                     | ND                  | Experienced nuclear medicine radiologists |
| Terakawa et al 2008 <sup>29</sup>            | MET      | Quantitative assessment using SUVmax, quantitative assessment using SUVmean, quantitative assessment using lesion to normal tissue ratio (L/N) max <sup>f</sup> , quantitative assessment using L/Nmean <sup>f</sup> | -                                                                                                                                                                         | -                                                                     | 1.58 (L/Nmean)                                                                                                                                                   | ND                     | 2                   | Experienced nuclear medicine radiologists |
| Nakajima et al 2009 <sup>30</sup>            | MET      | Quantitative assessment using tumor to normal gray matter ratio (T/N)                                                                                                                                                | -                                                                                                                                                                         | -                                                                     | 2.0                                                                                                                                                              | ND                     | ND                  | ND                                        |
| Spence et al 2009 <sup>40</sup>              | FDG, FLT | Visual assessment using a grading scale, quantitative assessment using SUVmean, SUVmax; tumor to normal cortex (T/C) or white matter ratio (T/WM) (FDG only); and kinetic mode (FLT only)                            | ND                                                                                                                                                                        | ND                                                                    | ND                                                                                                                                                               | ND                     | 2                   | Experienced nuclear medicine specialists  |
| Jeong et al 2010 <sup>31</sup>               | FLT, FET | Quantitative assessment using SUVmax, quantitative assessment using lesion to normal ratio (LNR) <sup>g</sup>                                                                                                        | -                                                                                                                                                                         | -                                                                     | Any grades: 0.44 (SUVmax, FLT), 1.66 (SUVmax, FET); 3.0 (LNR, FLT), 2.18 (LNR, FET), HGG: 0.8 (SUVmax, FLT), 1.66 (SUVmax, FET); 3.0 (LNR, FLT), 2.46 (LNR, FET) | ND                     | ND                  | ND                                        |
| Ozsunar et al 2010 <sup>32</sup>             | FDG      | Visual assessment                                                                                                                                                                                                    | ND                                                                                                                                                                        | ND                                                                    | -                                                                                                                                                                | ND                     | 2                   | Board-certified neuroradiologists         |
| Prat et al 2010 <sup>33</sup>                | FDG      | Semiquantitative assessment comparing pathologic images with those on the contralateral side <sup>h</sup>                                                                                                            | ND                                                                                                                                                                        | ND                                                                    | -                                                                                                                                                                | ND                     | ND                  | ND                                        |

continued

ON-LINE TABLE 4, continued

| Study                                                                      | PET Drug   | Method                                                                                                                                                  | Visual Assessment                                                                                                                                                       |                                               | Quantitative Assessment, Cutoff Value | Referent Baseline Scan | No. of Interpreters | Experience of Interpreters                    |
|----------------------------------------------------------------------------|------------|---------------------------------------------------------------------------------------------------------------------------------------------------------|-------------------------------------------------------------------------------------------------------------------------------------------------------------------------|-----------------------------------------------|---------------------------------------|------------------------|---------------------|-----------------------------------------------|
|                                                                            |            |                                                                                                                                                         | Positive Criteria                                                                                                                                                       | Negative Criteria                             |                                       |                        |                     |                                               |
| Santra et al 2012 <sup>41</sup>                                            | FDG        | Visual assessment                                                                                                                                       | A definite lesion on CT images (hypermetabolic/iso-metabolic/hypometabolic on PET images) or an increased focal FDG uptake without any clearly discernible lesion on CT | ND                                            | –                                     | ND                     | 2                   | Experienced nuclear medicine physicians       |
| High-grade only<br>Valk et al 1988 <sup>34</sup>                           | FDG        | Visual assessment                                                                                                                                       | Activity greater than or equal to that of the adjacent brain                                                                                                            | Activity less than that of the adjacent brain | –                                     | ND                     | 2                   | ND                                            |
| Van Tassel et al 1995 <sup>35</sup><br>Tsuyuguchi et al 2004 <sup>36</sup> | FDG<br>MET | Visual assessment<br>Visual assessment, quantitative assessment using SUVmean, quantitative assessment using tumor lesion to normal ratio (Tmean/Nmean) | Hypermetabolic tumor<br>ND                                                                                                                                              | ND<br>ND                                      | –<br>ND                               | ND<br>ND               | ND<br>2             | ND<br>Experienced nuclear medicine physicians |
| Miyashita et al 2008 <sup>37</sup>                                         | BPA        | Quantitative assessment using lesion to normal ratio (L/N) <sup>k</sup>                                                                                 | –                                                                                                                                                                       | –                                             | 2                                     | Performed partially    | ND                  | ND                                            |
| Dandois et al 2010 <sup>38</sup>                                           | MET        | Visual assessment                                                                                                                                       | ND                                                                                                                                                                      | ND                                            | –                                     | ND                     | ND                  | Nuclear medicine physicians                   |
| Kim et al 2010 <sup>39</sup>                                               | FDG, MET   | Visual assessment, quantitative assessment using lesion to reference area ratio (Lmax/Rmax) <sup>k</sup>                                                | ND                                                                                                                                                                      | ND                                            | 1.45 (FDG), 2.64 (MET)                | ND                     | ND                  | ND                                            |

**Note.**—BPA indicates 18F-boronophenylalanine; CAQ, certificate of added qualification; ND, no data; SUV, standard uptake value; Lmax, maximum uptake in tumor lesion; R/max, maximum uptake in reference area; L/NR, lesion to normal ratio; Tmean, mean uptake in tumor lesion; Nmean, mean uptake in normal brain; T/N, tumor to normal; BG, background; SUVmax, maximum standardized uptake value; SUVmean, mean standardized uptake value; T/WMM, tumor to white matter ratio; HGG, high-grade glioma.

<sup>a</sup> Grade 1 = slightly less uptake than surrounding area, grade 3 = same uptake as surrounding area, grade 4 = slightly to moderately increased uptake compared with surrounding area, grade 5 = markedly increased uptake. Grade 0 = intensity less than that of white matter, grade 1 = intensity similar to that of white matter, grade 2 = intensity between white matter and gray matter, grade 3 = intensity similar to gray matter, grade 4 = intensity higher than gray matter.

<sup>c</sup> Grade 0 = no applicable metabolic uptake, grade 1 = similar to normal contralateral white matter, grade 2 = between contralateral white matter and gray matter, grade 3 = equal to or over gray matter.

<sup>d</sup> Differential absorption ratio defined as the product of tissue radioactivity and the patient's body weight divided by the administered radioactivity of MET was used to estimate T/N ratio.

<sup>e</sup> Background (BG) was defined as the mean uptake of 70% and 80% of isocontour regions mirrored to the contralateral (ie, non-tumor-bearing) hemisphere.

<sup>f</sup> L/Nmean was defined as the SUVmean of the lesion divided by the SUVmean of the contralateral normal frontal-lobe gray matter. L/Nmax was defined as the SUVmax of the lesion divided by the SUVmean of the contralateral normal frontal-lobe gray matter.

<sup>g</sup> Normal brain parenchyma, usually in the contralateral normal frontal cerebral cortex was used as the reference.

<sup>h</sup> Visual assessment (inferred).

<sup>i</sup> Normal gray matter in the contralateral frontal lobe was used as the reference.

<sup>j</sup> Normal brain area in the contralateral brain lobe was used as the reference.

<sup>k</sup> Corresponding area in the contralateral brain lobe was used as the reference.

**ON-LINE TABLE 5: Quality assessment of included studies**

| Study                               | 1             | 2                  | 3                  | 4                         | 5                              | 6                  | 7          | 8                  | 9                | 10                    | 11                | 12            | 13                                      | 14         |
|-------------------------------------|---------------|--------------------|--------------------|---------------------------|--------------------------------|--------------------|------------|--------------------|------------------|-----------------------|-------------------|---------------|-----------------------------------------|------------|
|                                     | Spectrum Bias | Inclusion Criteria | Reference Standard | Partial Verification Bias | Differential Verification Bias | Incorporation Bias | Index Test | Reference Standard | Test Review Bias | Diagnosis Review Bias | Treatment Paradox | Clinical Data | Uninterpretable or Intermediate Results | Withdrawal |
| Any grades                          |               |                    |                    |                           |                                |                    |            |                    |                  |                       |                   |               |                                         |            |
| Janus et al 1993 <sup>16</sup>      | N             | Y                  | Y                  | Y                         | U                              | Y                  | Y          | Y                  | Y                | U                     | N                 | Y             | N                                       | N          |
| Kahn et al 1994 <sup>17</sup>       | N             | Y                  | Y                  | Y                         | U                              | Y                  | Y          | Y                  | Y                | Y                     | U                 | Y             | Y                                       | N          |
| Nelson et al 1997 <sup>18</sup>     | N             | U                  | N                  | Y                         | U                              | U                  | Y          | N                  | U                | U                     | U                 | Y             | Y                                       | N          |
| Ricci et al 1998 <sup>19</sup>      | N             | Y                  | N                  | N                         | Y                              | Y                  | Y          | Y                  | U                | U                     | U                 | Y             | Y                                       | Y          |
| Sonoda et al 1998 <sup>20</sup>     | N             | U                  | Y                  | Y                         | U                              | U                  | Y          | Y                  | U                | U                     | U                 | U             | N                                       | N          |
| Bader et al 1999 <sup>21</sup>      | Y             | U                  | N                  | Y                         | Y                              | Y                  | Y          | Y                  | U                | U                     | Y                 | U             | Y                                       | N          |
| Thompson et al 1992 <sup>2</sup>    | N             | Y                  | N                  | N                         | Y                              | Y                  | N          | Y                  | U                | U                     | U                 | U             | N                                       | N          |
| Belohlávek et al 2002 <sup>23</sup> | N             | U                  | U                  | Y                         | U                              | U                  | Y          | N                  | Y                | U                     | U                 | N             | Y                                       | N          |
| Pöpperl et al 2004 <sup>24</sup>    | N             | U                  | U                  | Y                         | U                              | U                  | Y          | Y                  | U                | U                     | U                 | U             | N                                       | N          |
| Van Laere et al 2005 <sup>25</sup>  | N             | U                  | U                  | Y                         | U                              | U                  | Y          | N                  | U                | U                     | U                 | U             | N                                       | Y          |
| Rachinger et al 2005 <sup>26</sup>  | N             | U                  | Y                  | Y                         | Y                              | Y                  | Y          | Y                  | U                | Y                     | U                 | U             | N                                       | N          |
| Gómez-Río et al 2008 <sup>27</sup>  | Y             | Y                  | Y                  | Y                         | U                              | Y                  | Y          | Y                  | U                | U                     | U                 | Y             | N                                       | N          |
| Mehrkens et al 2008 <sup>28</sup>   | Y             | Y                  | Y                  | Y                         | U                              | Y                  | Y          | Y                  | U                | Y                     | U                 | Y             | N                                       | N          |
| Terakawa et al 2008 <sup>29</sup>   | N             | Y                  | U                  | Y                         | U                              | Y                  | Y          | Y                  | U                | U                     | Y                 | Y             | N                                       | Y          |
| Nakajima et al 2009 <sup>30</sup>   | N             | U                  | U                  | Y                         | U                              | U                  | Y          | N                  | U                | U                     | U                 | Y             | N                                       | N          |
| Spence et al 2009 <sup>40</sup>     | N             | Y                  | Y                  | Y                         | U                              | Y                  | Y          | Y                  | U                | U                     | Y                 | U             | Y                                       | N          |
| Jeong et al 2010 <sup>31</sup>      | N             | Y                  | Y                  | Y                         | U                              | Y                  | Y          | Y                  | U                | U                     | U                 | Y             | N                                       | N          |
| Ozsunar et al 2010 <sup>32</sup>    | N             | Y                  | Y                  | Y                         | U                              | U                  | Y          | Y                  | U                | Y                     | U                 | U             | N                                       | N          |
| Prat et al 2010 <sup>33</sup>       | N             | Y                  | Y                  | Y                         | U                              | Y                  | N          | Y                  | U                | U                     | U                 | U             | N                                       | N          |
| Santra et al 2012 <sup>41</sup>     | Y             | Y                  | Y                  | Y                         | U                              | Y                  | Y          | Y                  | Y                | U                     | U                 | N             | N                                       | N          |
| High-grade only                     |               |                    |                    |                           |                                |                    |            |                    |                  |                       |                   |               |                                         |            |
| Valk et al 1988 <sup>34</sup>       | N             | Y                  | Y                  | Y                         | U                              | U                  | Y          | Y                  | U                | U                     | N                 | U             | N                                       | N          |
| Van Tassel et al 1995 <sup>35</sup> | N             | Y                  | N                  | N                         | Y                              | Y                  | N          | Y                  | U                | U                     | U                 | U             | N                                       | Y          |
| Tsuyuguchi et al 2004 <sup>36</sup> | N             | U                  | Y                  | Y                         | U                              | U                  | Y          | Y                  | U                | U                     | U                 | U             | N                                       | N          |
| Miyashita et al 2008 <sup>37</sup>  | N             | U                  | Y                  | Y                         | U                              | Y                  | Y          | Y                  | U                | U                     | U                 | Y             | N                                       | N          |
| Dandois et al 2010 <sup>38</sup>    | N             | U                  | N                  | Y                         | U                              | N                  | Y          | N                  | U                | N                     | Y                 | U             | N                                       | N          |
| Kim et al 2010 <sup>39</sup>        | N             | Y                  | Y                  | Y                         | U                              | Y                  | Y          | Y                  | U                | U                     | U                 | Y             | N                                       | N          |

Note:—Y indicates yes (relevant information reported or bias avoided); N, no (relevant information not reported or bias not avoided); U, unclear (insufficient reporting or avoidance of bias unclear).
